# Supplementary material
Source: PubMed Central journal article supplement (PMC4258235)

Increasing NRL between +1/+2

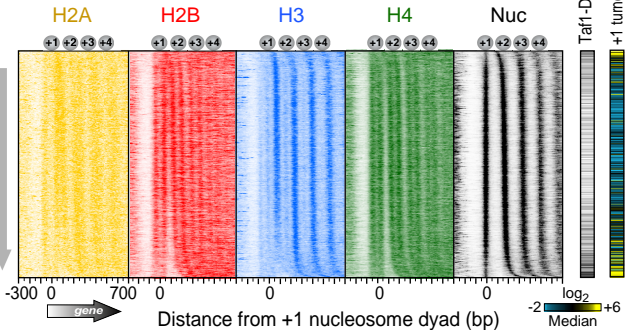

Supplement: NIHMS640718-supplement-1.pdf [file NIHMS640718-supplement-1.pdf]

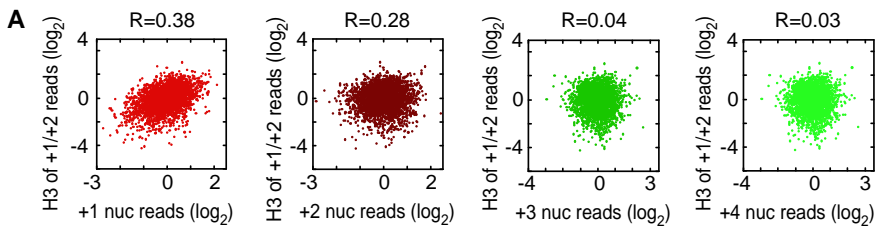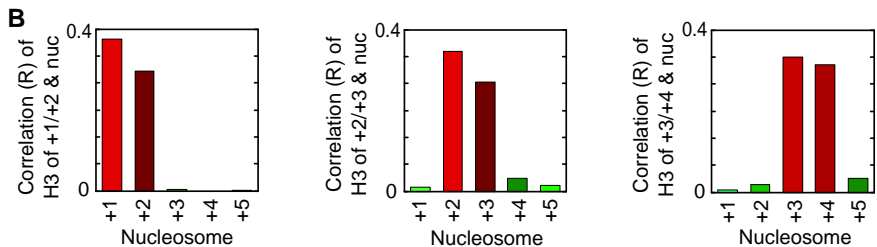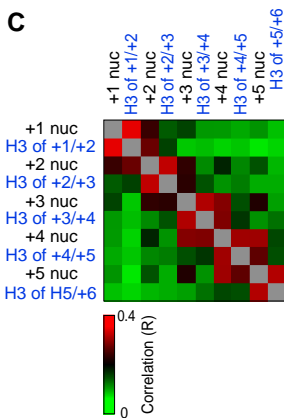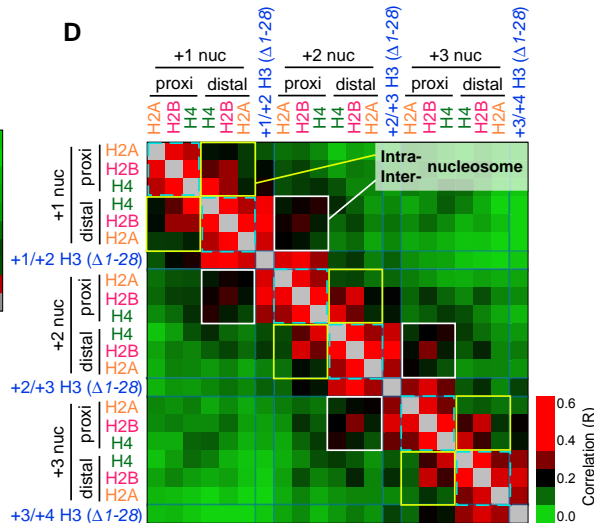

Supplement: NIHMS640718-supplement-2.pdf [file NIHMS640718-supplement-2.pdf]

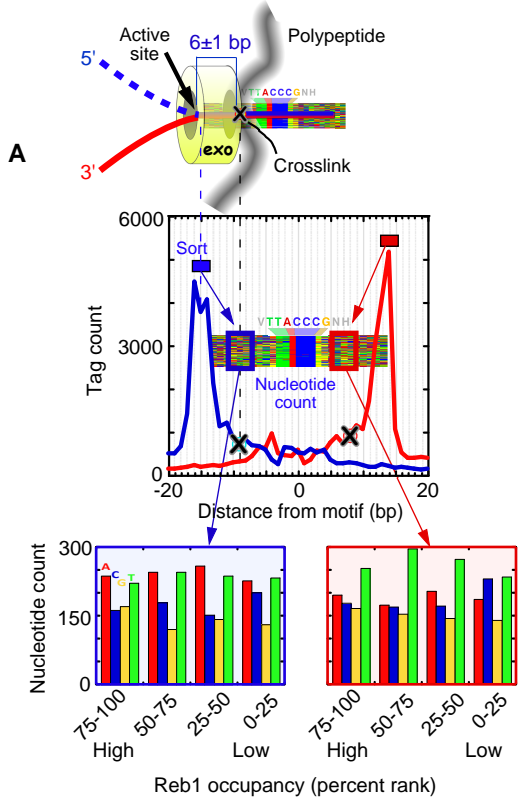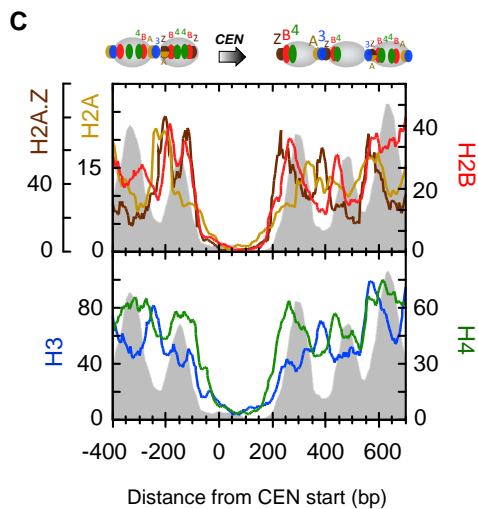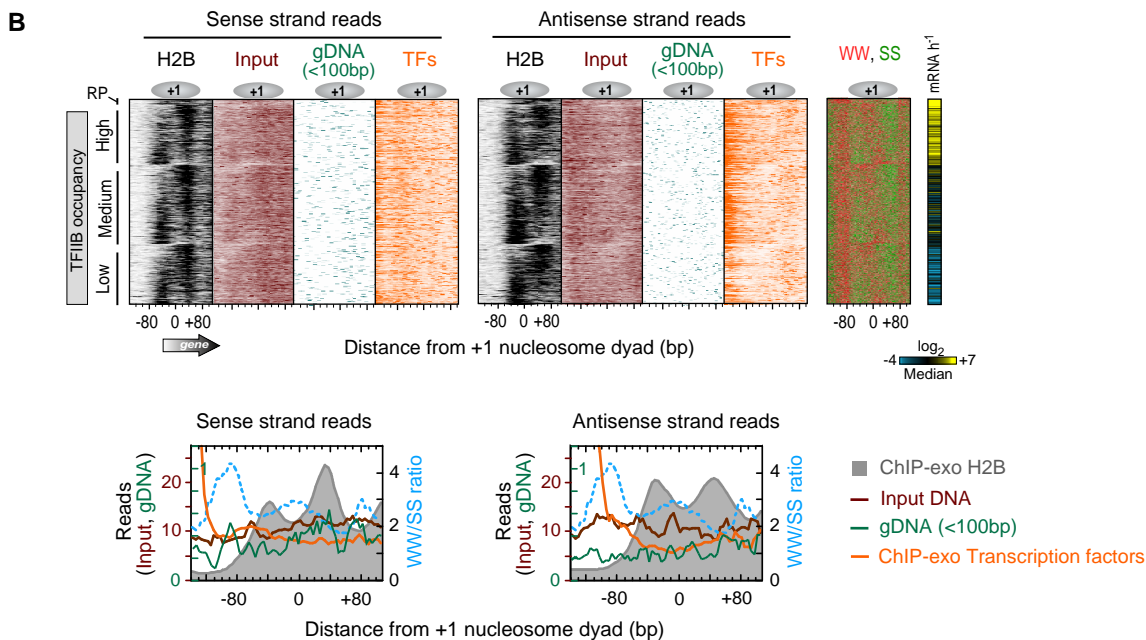

Supplement: NIHMS640718-supplement-3.pdf [file NIHMS640718-supplement-3.pdf]

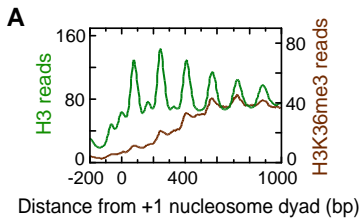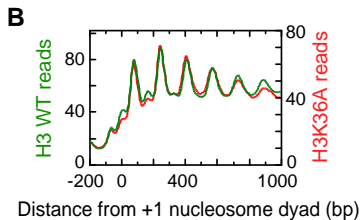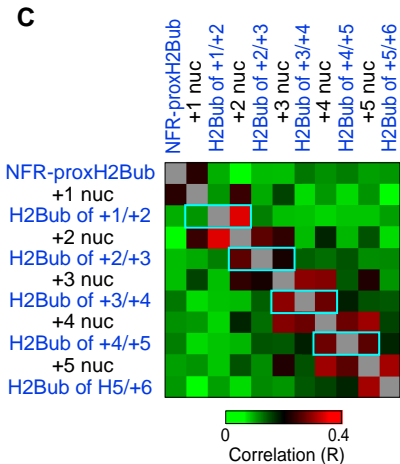

Supplement: NIHMS640718-supplement-4.pdf [file NIHMS640718-supplement-4.pdf]
